# Supplementary material
Source: publisher figshare collection journal article supplement (https://gsajournals.figshare.com/ndownloader/files/24368987)
Supplement: Supplementary file 1 [file 24368987]

## Sheet: Sheet1
Supplemental Table S3. A. N. Gale et al
List of oligonucleotides used in this study
Oligo Name	Sequence
Adaptors	directly ligated to sheared and repaired gDNA	reference	index	use
Spl-Top	GTTCCCATGGTACTACTCATATAATACGACTCACTATAGGTGACAGCGAGCGCT	Bronner et al		Cg-1
Spl-Bot	P‑GCGCTCGCTGTCACCTATAGTGAGTCGTATTATAATTTTTTTTTCAAAAAAA	Bronner et al		Cg-1
Spl-Top-I1	GTTCCCATGGTACTACTCATATAATACGACTCACTATAGGTGACAGCGAGCGCCGTGAT*T	this study	CGTGAT	Cg-2, Cg-1(0-fluc)
Spl-Bot-I1	P‑ATCACGGCGCTCGCTGTCACCTATAGTGAGTCGTATTATAATTTTTTTTTCAAAAAAA	this study	CGTGAT	Cg-2, Cg-1(0-fluc)
Spl-Top-I2	GTTCCCATGGTACTACTCATATAATACGACTCACTATAGGTGACAGCGAGCGCACATCG*T	this study	ACATCG	Cg-3
Spl-Bot-I2	P‑CGATGTGCGCTCGCTGTCACCTATAGTGAGTCGTATTATAATTTTTTTTTCAAAAAAA	this study	ACATCG	Cg-3
Spl-Top-I3	GTTCCCATGGTACTACTCATATAATACGACTCACTATAGGTGACAGCGAGCGCGCCTAA*T	this study	GCCTAA	Cg-2, Cg-1(128-fluc)
Spl-Bot-I3	P‑TTAGGCGCGCTCGCTGTCACCTATAGTGAGTCGTATTATAATTTTTTTTTCAAAAAAA	this study	GCCTAA	Cg-2, Cg-1(128-fluc)
Spl-Top-I4	GTTCCCATGGTACTACTCATATAATACGACTCACTATAGGTGACAGCGAGCGCTGGTCA*T	this study	TGGTCA	Cg-3
Spl-Bot-I4	P‑TGACCAGCGCTCGCTGTCACCTATAGTGAGTCGTATTATAATTTTTTTTTCAAAAAAA	this study	TGGTCA	Cg-3
Spl-Top-I5	GTTCCCATGGTACTACTCATATAATACGACTCACTATAGGTGACAGCGAGCGCCACTGT*T	this study	CACTGT
Spl-Bot-I5	P‑ACAGTGGCGCTCGCTGTCACCTATAGTGAGTCGTATTATAATTTTTTTTTCAAAAAAA	this study	CACTGT
Spl-Top-I6	GTTCCCATGGTACTACTCATATAATACGACTCACTATAGGTGACAGCGAGCGCATTGGC*T	this study	ATTGGC
Spl-Bot-I6	P‑GCCAATGCGCTCGCTGTCACCTATAGTGAGTCGTATTATAATTTTTTTTTCAAAAAAA	this study	ATTGGC
	P indicates phosphate
	* indicates a phosphorothioate bond
PCR Primers	used in two rounds of PCR amplification
HR-1	AATACTTGCACTCAAAAGGCTTGACACC	this study
HR-2	AATGATACGGCGACCACCGAGATCTACACCACACTTGTGCTTATCTATGTGGC	this study
SplAP1	GTTCCCATGGTACTACTCATA	Bronner et al
P7-SplAP2	CAAGCAGAAGACGGCATACGAGATCGGTTAATACGACTCACTATAGG	Bronner et al
Seq-Primers	used in Illumina instrument
P7 Primer	TACGACTCACTATAGGTGACAGCGAGCGCT	Bronner et al
P7 Index Primer	TACGACTCACTATAGGTGACAGCGAGCGC	this study
Hermes Seq Primer	CGGCGACCACCGAGATCTACACCACACTTGTGCTTATCTATGTGGCTTACGTTTGCCTGTGGCTTGTTGAAGTTCTCTG	this study
Knockout Primers	lower case indicates fusion sequence
Ura3-F	ccgctgctaggcgcgccgtgGTATCACGAGGCCCTTTCGT	this study
Ura3-R	gcagggatgcggccgctgacCCTGATGCGGTATTTTCTCC	this study
IDH2-L-F	CAGCAGGATCCAAGGAGAGA	this study
IDH2-L-R	cacggcgcgcctagcagcggTCCTTTCCTCTATACTAACGATACCC	this study
IDH2-R-F	gtcagcggccgcatccctgcTCACTACAGCCATCTCACAACA	this study
IDH2-R-R	AGGATTCATACATGGCAGACG	this study
KGD2-L-F	GGATGTTTTGTAAACCCAGCA	this study
KGD2-L-R	cacggcgcgcctagcagcggTCGTTCTGTAGTAGTTTTCCTCTCC	this study
KGD2-R-F	gtcagcggccgcatccctgcTTCATCATTTTTGAAGGGGACT	this study
KGD2-R-R	TCCGGAAGTTAACGGGAAAT	this study
Screening Primers
IDH2-L-Screen	TAAAAATGCAGCACCGTGAG	this study
IDH2-R-Screen	ACAGCGAAGAAGACCGAAAA	this study
KGD2-L-Screen	TTCCCCTACCCCTACAATCC	this study
KGD2-R-Screen	CAACTTCGTCTTCTGCCACA	this study
